# Supplementary material for: Critical Review for the Production of Antidiabetic Peptides by a Bibliometric Approach
Source: MDPI journal article supplement (doi:10.3390/nu14204275), 2022-10-14
Supplement: s1 [file s1]

Supplementary Table S1. Selected studies without peptide sequence and their respective outcomes of interest.

| Authors (year)                 | Source of protein                      | Peptide Sequence    | Outcomes of interest                                                                                                                                                                                        |
|--------------------------------|----------------------------------------|---------------------|-------------------------------------------------------------------------------------------------------------------------------------------------------------------------------------------------------------|
| Han, et al., 2021              | Oilseed and dairy protein hydrolysates | _____               | Oilseed proteins could be considered as comparable sources of ACE and alpha-glucosidase inhibitory peptides, especially soybean.                                                                            |
| Kong, et al., 2021             | Walnut ( <i>Juglans regia</i> L.)      | Table 1A            | The peptide fraction with lower molecular weight and higher basic amino acid residues possessed strong DPP-IV inhibitory activity. Nine novel effective bioactive peptides were identified in the fraction. |
| Mazloomi, et al., 2021         | Orange seed                            | _____               | Could be used as a health-promoting ingredient to help in the reduction of blood pressure and the regulation of diabetes.                                                                                   |
| Rivero-Pino, et al., 2021b     | <i>Tenebrio molitor</i>                | Table 3 and Table 4 | Potential ingredients in functional foods intended for the regulation of diabetes.                                                                                                                          |
| Acquah, et al., 2020           | Review                                 | Table 2             | Bioactive peptides could serve as important primary strategies for management and/or control of diabetes.                                                                                                   |
| Akan, E., 2020                 | Camel milk and donkey milk             | _____               | Peptides showed better antidiabetic and antioxidant activity compared to whey-derived peptides.                                                                                                             |
| Harnedy-Rothwell, et al., 2020 | Boarfish ( <i>Capros aper</i> )        | Table 3             | IPVDM, a potent DPP-IV inhibitory activity in the in vitro assay, also showed potent activity in a cell-based DPP-IV inhibitory assay.                                                                      |

| Authors (year)              | Source of protein                                    | Peptide Sequence | Outcomes of interest                                                                                                                                                                               |
|-----------------------------|------------------------------------------------------|------------------|----------------------------------------------------------------------------------------------------------------------------------------------------------------------------------------------------|
| Karimi, et al.,<br>2020     | Corn germ protein                                    | ————             | The fractions showed high radical scavenging and $\alpha$ -glucosidase inhibitory activity, and $\alpha$ -amylase inhibitory activity can be attributed to high levels of hydrophobic amino acids. |
| Kehinde and<br>Sharma, 2020 | Review                                               | All tables       | Several BHs and BPs have been isolated from dairy, meat, cereals and legumes;                                                                                                                      |
| Li, et al., 2020            | Arthrospira Platensis<br>(Spirulina)                 | ————             | Tryptic phycobiliproteins hydrolysate is a new source of peptides for the development of nutraceuticals or functional foods.                                                                       |
| Megrous, et al.,<br>2020    | Casein Hydrolysates                                  | ————             | Casein hydrolysates generated by metalloendopeptidase under selected hydrolysis conditions showed significant antidiabetic properties.                                                             |
| Mudgil, et al.,<br>2020     | Quinoa (Chenopodium<br>quinoa Willd.)                | Table 2          | Effective inhibitory properties towards enzymatic biomarkers of diabetes (DPP-IV and AG) and hypertension (ACE).                                                                                   |
| Ohara, et al., 2020         | Common bean<br>(Phaseolus vulgaris L. cv<br>Carioca) | ————             | Antidiabetic potential was evidenced by total inhibition of alpha-amylase activity and reduction of alpha-glucosidase activity by 34.73%.                                                          |
| Olagunju, et al.,<br>2020   | Pigeon pea (Cajanus<br>cajan)                        | ————             | Potential ingredients to formulate antihypertensive and antidiabetic functional foods and nutraceuticals.                                                                                          |
| Patil, et al., 2020         | Review                                               | Table 2          | Bioactive peptides inhibit enzymes such as alpha-glucosidase, alpha-amylase, dipeptidyl peptidase-IV and glucose transporter systems involved in type 2 diabetes.                                  |

| Authors (year)               | Source of protein                       | Peptide Sequence                                                                                   | Outcomes of interest                                                                                                                              |
|------------------------------|-----------------------------------------|----------------------------------------------------------------------------------------------------|---------------------------------------------------------------------------------------------------------------------------------------------------|
| Rivero-Pino, et al., 2020a   | Sardine pilchardus                      | Table 3                                                                                            | The most bioactive fraction ranges from 800 to 1400 Da.                                                                                           |
| Rivero-Pino, et al., 2020b   | Review                                  | Table 2                                                                                            | The potential of bioactive peptides as antidiabetic agents to be employed in food formulation is a relevant field of research.                    |
| Rivero-Pino, et al., 2020c   | Tenebrio molitor                        | —                                                                                                  | Ultrasound pre-treatment modifies the native structure of the protein and subtilisin hydrolysis reduces the size of the peptide chain.            |
| Wu, et al., 2020             | Review                                  | Review of peptides from cereals and pseudo cereals                                                 | Protein hydrolysates and peptides isolated from rice, wheat, oats, buckwheat, quinoa, barley, and corn have antidiabetic effects.                 |
| Yap, et al., 2020            | Review                                  | Table 1                                                                                            | Bioinformatics approach emerges as an innovative breakthrough to ameliorate the time and economic viability of traditional.                       |
| Zamudio and Campos, 2020     | Review                                  | Review of proteins and peptides from animal and plant sources focused on amaranth, quinoa and chia | Excellent alternative for further development of antidiabetic functional food and nutraceuticals.                                                 |
| Casanova-Martí, et al., 2019 | Chicken feet (Gallus gallus domesticus) | —                                                                                                  | Was a good source of DPP-IV inhibitors reducing glycaemia in glucose-intolerant rats and provided good stimulation of endogenous GLP-1 secretion. |
| Cermeño, et al., 2019        | Porphyra dioica                         | Table 4                                                                                            | Peptides therein may be used as multifunctional ingredients in nutraceutical or functional food products.                                         |

| Authors (year)            | Source of protein                                  | Peptide Sequence | Outcomes of interest                                                                                                                                        |
|---------------------------|----------------------------------------------------|------------------|-------------------------------------------------------------------------------------------------------------------------------------------------------------|
| Connolly, et al.,<br>2019 | Brewers' spent grain                               | _____            | The extraction of bioactive peptides from wet BSG by direct hydrolysis is a viable method for processing BSG.                                               |
| Gomez, et al.,<br>2019    | Portuguese Oyster<br>(Crassostrea angulata)        | _____            | Good source of peptides with ACE and DPP-IV inhibitory activities.                                                                                          |
| Ibrahim, et al.,<br>2019  | In silico analysis                                 | Table 2          | Potato-derived BP: antidiabetic and antimicrobial potentials; yam-derived BP: antihypertensive and anticancer agents.                                       |
| Kęska, et al.,<br>2019    | Porcine (Sus scrofa)<br>skeletal muscle            | Table 4          | Digested <i>in silico</i> by gastrointestinal enzymes have a high potential for the management of blood glucose levels in patients with T2DM.               |
| Lima, et al., 2019        | Chicken by-product                                 | Table 2          | Can potentially serve as ingredients of multi-functional foods with dual effects of DPP-IV inhibition and enhancement of cellular glucose uptake.           |
| Liu, et al., 2019         | Review                                             | Table 2          | Diets rich in specific bioactive ingredients, including food protein-derived peptides, have potential application in the prevention and management of T2DM. |
| Mudgil, et al.,<br>2019   | Camel skin (Camelus<br>dromedaries)                | _____            | ACE, DPP-IV and pancreatic $\alpha$ -amylase inhibition by camel skin gelatin hydrolysates was reported for the first time.                                 |
| Park and Yoon,<br>2019    | Perilla (Perilla frutescens<br>var. japonica Hara) | _____            | Peptides fractionated by UF were found to have various physiological functions: antioxidant, antidiabetic and antihypertensive activities.                  |

| Authors (year)                 | Source of protein                            | Peptide Sequence | Outcomes of interest                                                                                                                                                         |
|--------------------------------|----------------------------------------------|------------------|------------------------------------------------------------------------------------------------------------------------------------------------------------------------------|
| Valencia-Mejía, et al., 2019   | Beans ( <i>Phaseolus vulgaris</i> L.)        | _____            | Hydrolysis of common beans was able to produce molecules with higher hypoglycemic and antihyperglycemic activities.                                                          |
| Yan, et al., 2019              | Review                                       | Table 1          | Bioactive peptides, particularly from natural products, show high potential for application in the management and treatment of diabetes.                                     |
| González-Montoya, et al., 2018 | Soybean protein                              | Table 2          | First report. Inhibition of DPP-IV, $\alpha$ -amylase and intestinal $\alpha$ -glucosidases with potential antidiabetic properties.                                          |
| Hall, et al., 2018             | Cricket ( <i>Gryllodes sigillatus</i> )      | _____            | Peptides displayed good ACE, DPP-IV inhibition, and antioxidant activity; bioactivity increased, in most cases, after simulated gastrointestinal digestion.                  |
| Harnedy, et al., 2018          | Atlantic salmon ( <i>Salmo salar</i> )       | _____            | Hydrolysates/peptides with significant antidiabetic (insulin and GLP-1 secretory and DPP-IV inhibitory) activity in vitro.                                                   |
| Mudgil, et al., 2018           | Camel milk ( <i>Camelus dromedaries</i> )    | _____            | Camel milk protein hydrolysates effectively inhibited DPP-IV, lipase and $\alpha$ -amylase.                                                                                  |
| Nongonierma, et al., 2018a     | Cricket ( <i>Gryllodes sigillatus</i> )      | _____            | First time report. The CP contains endogenous enzymes which were able per se to hydrolyze <i>G. sigillatus</i> proteins and yield samples with DPP-IV inhibitory properties. |
| Wang, et al., 2018             | Walnuts ( <i>Juglans mandshurica</i> Maxim.) | _____            | <i>In vivo</i> : WHPs alleviated insulin resistance by increasing insulin secretion, and liver GK and glycogen levels as well as by decreasing fasting blood glucose level.  |

| Authors (year)             | Source of protein                            | Peptide Sequence    | Outcomes of interest                                                                                                                                                |
|----------------------------|----------------------------------------------|---------------------|---------------------------------------------------------------------------------------------------------------------------------------------------------------------|
| Neves, et al., 2017        | Atlantic salmon ( <i>Salmo salar</i> )       | Table 2             | Peptides have biological activities, such as ACE and DPP-IV inhibition, and antioxidant capacity.                                                                   |
| Nongonierma, et al., 2017a | Camel milk ( <i>Camelus dromedarius</i> )    | Table 2 and Table 4 | The first time that camel milk proteins serve as an interesting source of DPP-IV inhibitory peptides by using an <i>in silico</i> analysis.                         |
| Nongonierma, et al., 2017b | Milk protein isolate                         | Table 3 and Table 4 | Some of these sequences were previously reported to be DPP-IV inhibitors or to possess structural features of DPP-IV inhibitory peptides.                           |
| Nongonierma, et al., 2017c | Wheat gluten                                 | Table 4             | Hydrolysate contained short (di- and tri-) peptides previously identified as DPP-IV inhibitors, and several peptides possessing DPP-IV inhibitory features.         |
| Nongonierma, et al., 2017d | Review                                       | Table 1             | Potent DPP-IV inhibitory peptides have been identified in several food protein-derived hydrolysates.                                                                |
| Nongonierma, et al., 2017e | Bovine milk protein                          | Table 3 and Table 4 | Several known, potent DPP-IV inhibitory peptides were identified within the milk protein hydrolysates.                                                              |
| Xia, et al., 2017          | Review                                       | Table 2             | Natural peptides derived from several kinds of marine organisms showed great potential to regulate glucose metabolism for insulin-resistant individuals.            |
| Mojica and Mejía, 2016     | Common beans ( <i>Phaseolus vulgaris</i> L.) | Table 2             | Alcalase protein fractions showed outstanding antidiabetic potential by inhibiting the targeted enzymes through hydrogen bonds, polar and hydrophobic interactions. |

| Authors (year)             | Source of protein             | Peptide Sequence | Outcomes of interest                                                                                                    |
|----------------------------|-------------------------------|------------------|-------------------------------------------------------------------------------------------------------------------------|
| Nongonierma, et al., 2016a | Casein hydrolysates           | _____            | A multi-functional hydrolysate, H12 (pH 8.0, 40 °C and 5 h), yielded high DPP-IV inhibitory and antioxidant activities. |
| Siow and Gan, 2016         | Cumin seeds (Cuminum Cyminum) | _____            | Antioxidant activity may turn them into potential ingredients of health-promoting or functional foods.                  |
| Uraipong & Zhao, 2016      | Rice bran (cultivar Reiziq)   | _____            | $\alpha$ -amylase, $\alpha$ -glucosidase and ACE-inhibition activities comparable in magnitude to acarbose.             |
