# Supplementary material for: Critical Review for the Production of Antidiabetic Peptides by a Bibliometric Approach
Source: MDPI journal article supplement (doi:10.3390/nu14204275), 2022-10-14
Supplement: s1 [file s1]

Supplementary Table S2. Studies that were selected and evaluated in the bibliometric review

| Authors (year)                 | Country                        | Type of inhibition                               | Type of analysis            | Type of document | Journal                                                    | Citations |
|--------------------------------|--------------------------------|--------------------------------------------------|-----------------------------|------------------|------------------------------------------------------------|-----------|
| Han et al. (2021)              | United Kingdom                 | $\alpha$ -glucosidase, DPP-IV                    | <i>in vitro</i>             | Original         | Current Research in Food Science                           | 0         |
| Kong et al. (2021)             | China                          | DPP-IV                                           | <i>in vitro</i>             | Original         | Food Chemistry                                             | 0         |
| Mazloomi et al. (2021)         | Spain, Iran                    | $\alpha$ -glucosidase, $\alpha$ -amylase         | <i>in vitro</i>             | Original         | Foods                                                      | 0         |
| Mudgil et al. (2021)           | United Arab Emirates, Malaysia | $\alpha$ -amylase, $\alpha$ -glucosidase, DPP-IV | <i>in vitro, in silico</i>  | Original         | Food Chemistry                                             | 2         |
| Rivero-Pino et al. (2021a)     | Spain                          | DPP-IV                                           | <i>in vitro, in silico</i>  | Original         | Food Chemistry                                             | 0         |
| Rivero-Pino et al. (2021b)     | Spain                          | DPP-IV, $\alpha$ -glucosidase                    | <i>in vitro, in silico</i>  | Original         | Food & Function                                            | 1         |
| Acquah et al. (2020)           | Canada, Australia, New Zealand | $\alpha$ -amylase, $\alpha$ -glucosidase         | <i>in vitro and in vivo</i> | Review           | Critical Reviews in Food Science and Nutrition             | 1         |
| Akan (2020)                    | Turkey                         | $\alpha$ -glucosidase, DPP-IV                    | <i>in vitro</i>             | Original         | Journal of Food Science and Technology                     | 1         |
| Feng et al. (2020)             | China                          | $\alpha$ -glucosidase                            | <i>in vitro</i>             | Original         | International Journal of Food Science and Technology       | 1         |
| Gao et al. (2020)              | China                          | DPP-IV                                           | <i>in vitro</i>             | Original         | Molecules                                                  | 0         |
| Harnedy-Rothwell et al. (2020) | Ireland, United Kingdom        | DPP-IV                                           | <i>in vitro, in situ</i>    | Original         | Food Research International                                | 2         |
| Ibrahim et al. (2020)          | South Africa, Nigeria          | DPP-IV, $\alpha$ -glucosidase                    | <i>in vitro, in silico</i>  | Original         | International Journal of Peptide Research and Therapeutics | 0         |
| Jia et al. (2020)              | China                          | DPP-IV                                           | <i>in vitro</i>             | Original         | Food Chemistry                                             | 6         |
| Jin et al. (2020)              | China                          | DPP-IV                                           | <i>in vitro</i>             | Original         | Food Research International                                | 2         |
| Karimi et al. (2020)           | Iran                           | $\alpha$ -glucosidase, $\alpha$ -amylase, DPP-IV | <i>in vitro</i>             | Original         | Food Science and Nutrition                                 | 6         |

|                              |                                         |                                                  |                             |          |                                                            |    |
|------------------------------|-----------------------------------------|--------------------------------------------------|-----------------------------|----------|------------------------------------------------------------|----|
| Kehinde and Sharma (2020)    | India                                   | DPP-IV                                           | -                           | Review   | Critical Reviews in Food Science and Nutrition             | 17 |
| Li et al. (2020)             | Italy                                   | DPP-IV                                           | <i>in vitro</i>             | Original | Nutrients                                                  | 2  |
| Megrous et al. (2020)        | China                                   | $\alpha$ -glucosidase, $\alpha$ -amylase         | <i>in vitro</i>             | Original | International Journal of Peptide Research and Therapeutics | 0  |
| Mudgil et al. (2020)         | United Arab Emirates, Malaysia, Ireland | DPP-IV                                           | <i>in vitro, in silico</i>  | Original | Journal of Cereal Science                                  | 1  |
| Ohara et al. (2020)          | Brazil                                  | $\alpha$ -amylase, $\alpha$ -glucosidase         | <i>in vitro</i>             | Original | Biocatalysts and Biotransformation                         | 5  |
| Olagunju et al. (2020)       | Nigeria, Canada                         | $\alpha$ -amylase, $\alpha$ -glucosidase         | <i>in vitro</i>             | Original | Journal of Food Biochemistry                               | 0  |
| Patil et al. (2020)          | India                                   | $\alpha$ -glucosidase, $\alpha$ -amylase, DPP-IV | <i>in vitro, in vivo</i>    | Review   | International Journal of Peptide Research and Therapeutics | 9  |
| Rivero-Pino et al. (2020a)   | Spain                                   | DPP-IV                                           | <i>in vitro, in silico</i>  | Original | Food Chemistry                                             | 42 |
| Rivero-Pino et al. (2020b)   | Spain                                   | --                                               | <i>in vitro, in silico</i>  | Review   | Foods                                                      | 7  |
| Rivero-Pino et al. (2020c)   | Spain                                   | $\alpha$ -glucosidase                            | <i>in vitro</i>             | Original | Food and Bioproducts Processing                            | 2  |
| Wu et al. (2020)             | China                                   | --                                               | <i>in vitro and in vivo</i> | Review   | E3S Web of Conferences                                     | 0  |
| Yap et al. (2020)            | Malaysia                                | DPP-IV, $\alpha$ -amylase, $\alpha$ -glucosidase | <i>in silico, in vivo</i>   | Review   | Trends in Food Science and Technology                      | 2  |
| Zamudio and Campos (2020)    | Mexico                                  | $\alpha$ -amylase, $\alpha$ -glucosidase, DPP-IV | <i>in vitro and in vivo</i> | Review   | Critical Reviews in Food Science and Nutrition             | 0  |
| Casanova-Martí et al. (2019) | Spain                                   | DPP-IV                                           | <i>in vitro, in vivo</i>    | Original | Food & Function                                            | 6  |
| Cermeño et al. (2019)        | Ireland                                 | DPP-IV                                           | <i>in vitro</i>             | Original | Food & Function                                            | 5  |
| Connolly et al. (2019)       | Ireland                                 | DPP-IV                                           | <i>in vitro</i>             | Original | Food Research International                                | 18 |

|                                |                               |                                                   |                                |          |                                                            |    |
|--------------------------------|-------------------------------|---------------------------------------------------|--------------------------------|----------|------------------------------------------------------------|----|
| Gomez et al. (2019)            | Philippines, Taiwan           | DPP-IV                                            | <i>in vitro, in silico</i>     | Original | International Journal of Molecular Sciences                | 4  |
| Ibrahim et al. (2019)          | South Africa, Nigeria         | DPP-IV                                            | <i>in silico</i>               | Original | International Journal of Peptide Research and Therapeutics | 6  |
| Kęska et al. (2019)            | Poland                        | DPP-IV                                            | <i>in silico</i>               | Original | Nutrients                                                  | 2  |
| Lima et al. (2019)             | Denmark                       | DPP-IV                                            | <i>in vitro</i>                | Original | Food & Function                                            | 2  |
| Liu et al. (2019)              | China, USA                    | DPP-IV                                            | <i>in silico and in vivo</i>   | Review   | International Journal of Molecular Sciences                | 47 |
| Mudgil et al. (2019)           | United Arab Emirates          | $\alpha$ -amylase, DPP-IV                         | <i>in vitro</i>                | Original | LWT                                                        | 10 |
| Nongonierma et al. (2019)      | Ireland, United Arab Emirates | DPP-IV                                            | <i>in silico and in silico</i> | Original | Food Chemistry                                             | 4  |
| Park and Yoon (2019)           | Korea                         | $\alpha$ -amylase, $\alpha$ -glucosidase          | <i>in vitro</i>                | Original | Czech Journal of Food Sciences                             | 6  |
| Valencia-Mejía et al. (2019)   | Brazil, Mexico                | $\alpha$ -amylase, $\alpha$ -glucosidase          | <i>in vitro, in vivo</i>       | Original | Food Research International                                | 5  |
| Vilcacundo et al. (2019)       | Spain, Ecuador                | DPP-IV, $\alpha$ -amylase                         | <i>in vitro</i>                | Original | Journal of the Science of Food and Agriculture             | 7  |
| Wang et al. (2019)             | China, United Kingdom         | $\alpha$ -glucosidase, DPP-IV                     | <i>in vitro</i>                | Original | Food Science and Nutrition                                 | 26 |
| Xu et al. (2019)               | China                         | DPP-IV                                            | <i>in vitro</i>                | Original | Journal of Agricultural and Food Chemistry                 | 3  |
| Yan et al. (2019)              | China                         | $\alpha$ -amylase, $\alpha$ -glucosidase, DPP-IV  | <i>in vitro</i>                | Review   | International Journal of Food Science and Technology       | 13 |
| Zheng et al. (2019)            | China                         | DPP-IV                                            | <i>in vitro</i>                | Original | Journal of Agricultural and Food Chemistry                 | 1  |
| González-Montoya et al. (2018) | Mexico and Spain              | DPP-IV, $\alpha$ -amylase, $\alpha$ -glucosidases | <i>in vitro</i>                | Original | International Journal of Molecular Sciences                | 31 |
| Hall et al. (2018)             | USA                           | DPP-IV                                            | <i>in vitro</i>                | Original | Food Chemistry                                             | 13 |

|                                    |                                |                                          |                                   |          |                                                |    |
|------------------------------------|--------------------------------|------------------------------------------|-----------------------------------|----------|------------------------------------------------|----|
| Harnedy et al. (2018)              | Ireland                        | DPP-IV                                   | <i>in vitro</i>                   | Original | Food Research International                    | 6  |
| Ibrahim et al. (2018)              | South Africa, Nigeria          | $\alpha$ -glucosidase, $\alpha$ -amylase | <i>in vitro, in silico</i>        | Original | Biomedicine & Pharmacotherapy                  | 22 |
| Mudgil et al. (2018)               | United Arab Emirates, Malaysia | DPP-IV, $\alpha$ -glucosidase            | <i>in vitro</i>                   | Original | Food Chemistry                                 | 57 |
| Mune et al. (2018)                 | Cameroon, Germany              | DPP-IV                                   | <i>in vitro, in silico</i>        | Original | Food Chemistry                                 | 26 |
| Nongonierma et al. (2018a)         | Ireland                        | DPP-IV                                   | <i>in vitro</i>                   | Original | Food & Function                                | 2  |
| Nongonierma et al. (2018b)         | Ireland, United Arab Emirates  | DPP-IV                                   | <i>in vitro, in silico</i>        | Original | Food Chemistry                                 | 9  |
| Wang et al. (2018)                 | China                          | $\alpha$ -glucosidase                    | <i>in vitro, in situ, in vivo</i> | Original | Journal of Food Biochemistry                   | 14 |
| Ji et al. (2017a)                  | China                          | DPP-IV                                   | <i>in vitro</i>                   | Original | Journal of Chromatography B                    | 6  |
| Ji et al. (2017b)                  | China                          | DPP-IV                                   | <i>in vitro</i>                   | Original | Journal of Food Science                        | 1  |
| Liu et al. (2017)                  | China                          | DPP-IV                                   | <i>in vitro, in silico</i>        | Original | Molecules                                      | 4  |
| Mojica et al. (2017)               | USA, Mexico                    | DPP-IV and $\alpha$ -glucosidase         | <i>in vitro</i>                   | Original | Journal of the Science of Food and Agriculture | 32 |
| Neves et al. (2017)                | Ireland                        | DPP-IV                                   | <i>in vitro</i>                   | Original | Food Chemistry                                 | 17 |
| Nongonierma et al. (2017a)         | Ireland, United Arab Emirates  | DPP-IV                                   | <i>in vitro, in silico</i>        | Original | Journal of Functional Foods                    | 43 |
| Nongonierma et al. (2017b)         | Ireland                        | DPP-IV                                   | <i>in vitro</i>                   | Original | Food Chemistry                                 | 4  |
| Nongonierma et al. (2017c)         | Ireland                        | DPP-IV                                   | <i>in vitro</i>                   | Original | Food & Function                                | 2  |
| Nongonierma and FitzGerald (2017d) | Ireland                        | DPP-IV                                   | -                                 | Review   | Journal of Food Biochemistry                   | 39 |
| Nongonierma et al. (2017e)         | Ireland                        | DPP-IV                                   | <i>in vitro</i>                   | Original | Food Research International                    | 8  |
| Song et al. (2017)                 | China                          | DPP-IV                                   | <i>in vitro</i>                   | Original | Journal of Dairy Science                       | 31 |

|                            |                |                                                     |                                     |          |                                                |    |
|----------------------------|----------------|-----------------------------------------------------|-------------------------------------|----------|------------------------------------------------|----|
| Taga et al. (2017)         | Japan          | DPP-IV                                              | <i>in vitro</i>                     | Original | Bioscience, Biotechnology, and Biochemistry    | 2  |
| Uraipong and Zhao (2017)   | Australia      | $\alpha$ -glucosidase                               | <i>in vitro</i>                     | Original | Journal of the Science of Food and Agriculture | 20 |
| Vilcacundo et al. (2017)   | Spain, Ecuador | DPP-IV, $\alpha$ -amylase and $\alpha$ -glucosidase | <i>in vitro</i>                     | Original | Journal of Functional Foods                    | 67 |
| Xia et al. (2017)          | China          | DPP-IV, $\alpha$ -amylase, $\alpha$ -glucosidase    | <i>in vitro, in silico, in vivo</i> | Review   | Marine Drugs                                   | 27 |
| Lammi et al. (2016)        | Italy          | DPP-IV                                              | <i>in vitro, in silico</i>          | Original | Journal of Agricultural and Food Chemistry     | 9  |
| Mojica and Mejía (2016)    | USA            | DPP-IV, $\alpha$ -amylase and $\alpha$ -glucosidase | <i>in vitro, and in silico</i>      | Original | Food & Function                                | 12 |
| Nongonierma et al. (2016a) | Ireland        | DPP-IV                                              | <i>in vitro</i>                     | Original | Journal of the Science of Food and Agriculture | 19 |
| Nongonierma et al. (2016b) | Ireland        | DPP-IV                                              | <i>in vitro, in silico</i>          | Original | Food &Function                                 | 4  |
| Siow and Gan (2016)        | Malaysia       | $\alpha$ -amylase                                   | <i>in vitro</i>                     | Original | Journal of Food Biochemistry                   | 13 |
| Uraipong and Zhao (2016)   | Australia      | $\alpha$ -amylase and $\alpha$ -glucosidase         | <i>in vitro</i>                     | Original | Journal of the Science of Food and Agriculture | 61 |
